# Supplementary material for: First-Episode Psychosis and Disengagement From Treatment: A Systematic Review
Source: Atypon-hosted journal article supplement (doi:10.1176/appi.ps.201200570), 2014-02-18
Supplement: 603_ds001.pdf [file 603_ds001.pdf]

Table 1: PUBMED Search Strategy

|                                                                                                                                                                     |                                  |
|---------------------------------------------------------------------------------------------------------------------------------------------------------------------|----------------------------------|
| <b><u>1.MeSH+Free Text</u></b>                                                                                                                                      |                                  |
| (1)Psychotic disorders (entry terms for psychotic Disorders include ‘psychosis’, ‘psychoses’, ‘schizoaffective disorder’, ‘brief reactive psychosis’ etc.)          |                                  |
| OR                                                                                                                                                                  |                                  |
| (2)Schizophrenia (entry terms=Schizophrenias, Schizophrenic Disorders, Disorder, Schizophrenic, Disorders, Schizophrenic, Schizophrenic Disorder, Dementia Praecox) |                                  |
| OR                                                                                                                                                                  |                                  |
| (3)Schizophrenia and Disorders with Psychotic Features (entry terms=none given/major topic)                                                                         |                                  |
| <b><u>Free text</u></b>                                                                                                                                             |                                  |
| 1. Engagement                                                                                                                                                       |                                  |
| 2. Disengagement                                                                                                                                                    |                                  |
| 3. Engagement predictors (quoted phrase not found)                                                                                                                  |                                  |
| 4. Drop-out (note: will include studies referring to drop-out rates in clinical trials)                                                                             |                                  |
| <b><u>Combined Search</u></b>                                                                                                                                       | <b><u>#Results generated</u></b> |
| 1+2+3+ ‘engagement’                                                                                                                                                 | 255                              |
| 1+2+3+ ‘disengagement’                                                                                                                                              | 44                               |
| 1+2+3+ ‘engagement predictors’                                                                                                                                      | 0                                |
| 1+2+3+ ‘drop-out’                                                                                                                                                   | 93                               |
| <b><u>2. Free Text combined search using quoted phrases</u></b>                                                                                                     |                                  |
| <b>(1)</b> ‘First episode psychosis’ AND ‘engagement’                                                                                                               | 21                               |
| <b>(2)</b> ‘First episode psychosis’ AND ‘disengagement’                                                                                                            | 6                                |
| <b>(3)</b> ‘First episode psychosis’ AND ‘nonadherence’                                                                                                             | 8                                |
| <b>TOTAL</b>                                                                                                                                                        | <b><u>427</u></b>                |

Table 2: PSYCHINFO Search Strategy

|                                                          |                           |
|----------------------------------------------------------|---------------------------|
| <b>(1)Psychotic disorders</b>                            |                           |
| <b>OR</b>                                                |                           |
| <b>(2)Schizophrenia</b>                                  |                           |
| <b>These terms were searched for as ‘Major Topics’</b>   |                           |
| <b>Free text</b>                                         |                           |
| <b>1. Engagement</b>                                     |                           |
| <b>2. Disengagement</b>                                  |                           |
| <b>3. Engagement predictors</b>                          |                           |
| <b>4. Drop-out</b>                                       |                           |
| <b>Combined Search</b>                                   | <b>#Results generated</b> |
| <b>1 or 2 + ‘engagement’</b>                             | 196 (13 of which=books)   |
| <b>1 or 2 + ‘disengagement’</b>                          | 36                        |
| <b>1 or 2 + ‘engagement predictors’</b>                  | 0                         |
| <b>1 or 2 + ‘drop-out’</b>                               | 52 (3 of which books)     |
| <b>2. Free Text combined search using quoted phrases</b> |                           |
| <b>(1) ‘First episode psychosis’ AND ‘engagement’</b>    | 30                        |
| <b>(2) ‘First episode psychosis’ AND ‘disengagement’</b> | 8                         |
| <b>(3) ‘First episode psychosis’ AND ‘nonadherence’</b>  | 9                         |
| <b>TOTAL</b>                                             | <b>331</b>                |

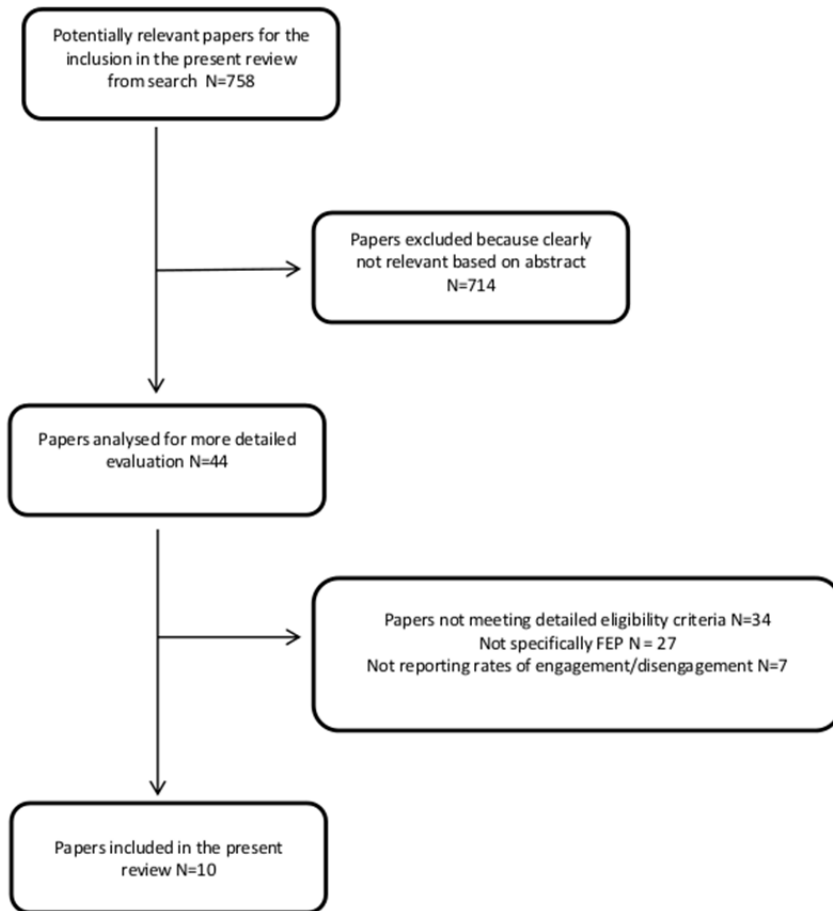

**Fig. 1.** The search strategy for the inclusion of studies in the current review

**Inclusion Criteria:** Studies reporting rates of engagement or disengagement within First Episode Psychosis Services or Early Intervention in Psychosis Services and patients with a specific FEP diagnosis (including first episode schizophrenia).

**Exclusion Criteria:** Studies reporting rates of disengagement from general mental health services, i.e. not specifically FEP populations.
